# Supplementary material for: RETRACTED: Endocytic recycling and vesicular transport systems mediate transcytosis of Leptospira interrogans across cell monolayer
Source: eLife journal article supplement (doi:10.7554/elife.44594), 2019-04-23
Supplement: supp [file elife_poa_e44594_Figure_1_source_data_1.xls]

## Sheet:  Figure 1B 
	Figure 1B
	Cells	Before infection			Time of infection (h)
					1			2			4			8			12			24
	HUVEC	11.5651	8.31845	7.78789	189.18	237.421	224.507	345.692	274.045	317.038	403.142	419.361	354.745	348.394	388.732	392.556	355.801	393.053	394.158	309.143	336.675	350.786
	EOMA	12.0871	5.69671	9.96088	193.118	188.561	226.474	336.607	283.461	293.014	407.543	362.777	370.929	352.119	391.897	404.97	408.005	347.839	379.506	332.196	371.881	316.273
	HK-2	6.61426	12.5514	8.90863	45.5893	81.3664	65.301	175.969	140.048	211.949	320.69	256.245	304.208	264.538	261.145	318.599	312.111	240.774	286.928	285.692	211.953	233.496
	TCMK-1	8.32159	8.04414	10.8341	51.2504	68.1979	86.0973	148.798	191.71	214.999	238.724	311.497	274.284	330.854	275.438	272.415	269.905	245.888	319.624	281.258	239.087	218.234
	BJ	8.20971	12.4733	6.24015	139.538	166.647	122.329	315.618	272.113	269.365	417.442	438.379	386.188	416.415	387.098	439.158	380.58	389.682	447.53	327.562	375.605	375.229
	NIH/3T3	11.6779	6.69443	9.10207	130.219	163.231	168.46	298.209	245.851	317.234	395.197	458.128	437.37	437.523	481.152	413.481	590.723	546.913	514.082	756.462	718.291	791.373
