# Supplementary material for: RETRACTED: Endocytic recycling and vesicular transport systems mediate transcytosis of Leptospira interrogans across cell monolayer
Source: eLife journal article supplement (doi:10.7554/elife.44594), 2019-04-23
Supplement: supp [file elife_poa_e44594_Figure_6_source_data_1.xls]

## Sheet:   Figure 6B  
	Figure 6B
	Cells		HUVEC			EOMA			HK-2			TCMK-1			BJ			NIH/3T3
	Without re-incubation		0	0	0	0	0	0	0	0	0	0	0	0	0	0	0	0	0	0
	Time of re-incubation (h)	4	200000	200000	0	100000	100000	300000	200000	200000	0	0	200000	200000	100000	100000	300000	200000	0	200000
		8	1800000	2200000	1600000	2200000	1600000	1600000	1200000	600000	1200000	1800000	1400000	1200000	1200000	800000	600000	1400000	1000000	800000
		12	3200000	4000000	4200000	2400000	3400000	2600000	1200000	2200000	1800000	1800000	2600000	2400000	2200000	3000000	3200000	3000000	3400000	3800000
		16	7200000	7600000	6400000	6400000	6200000	5200000	4000000	5000000	3800000	3600000	4800000	4800000	4400000	5800000	4800000	7400000	8000000	6800000
		24	12600000	13400000	12200000	10800000	12000000	10800000	9200000	10200000	9400000	8800000	9400000	10400000	12400000	12000000	11000000	17000000	15400000	16400000

## Sheet:   Figure 6C  
	Figure 6C
	Cells	Without re-incubation			Time of re-incubation (h)
					4			8			12			16			24
	HUVEC	40400000	43400000	38600000	38600000	40600000	44400000	41200000	37400000	36600000	36000000	39400000	34200000	36600000	34800000	31400000	24400000	30600000	30200000
	EOMA	39600000	40800000	44600000	40000000	44800000	39400000	38200000	34800000	40400000	34800000	32600000	39000000	31600000	36200000	32400000	26600000	29600000	24400000
	HK-2	21200000	17600000	23400000	17200000	21600000	22000000	17600000	15800000	21400000	15000000	19000000	15200000	16000000	17200000	13400000	13200000	9000000	10200000
	TCMK-1	22400000	16600000	21800000	20000000	19200000	24800000	16000000	15600000	21000000	14200000	19400000	13800000	17600000	13000000	15400000	7800000	10200000	13000000
	BJ	45600000	47600000	51600000	48600000	44000000	50800000	47800000	41800000	46800000	41400000	44200000	46600000	46400000	40400000	42400000	34800000	34400000	39800000
	NIH/3T3	46000000	47600000	51000000	50200000	50200000	46400000	54800000	52600000	50400000	64200000	60600000	61000000	63600000	65600000	69600000	73800000	73400000	78400000

## Sheet:   Figure 6D  
	Figure 6D
	Cells	Without re-incubation			Time of re-incubation (h)
					4			8			12			16			24
	HUVEC	392.686	417.568	377.746	416.352	392.267	381.67	395.44	390.845	360.595	352.362	363.933	389.403	351.514	323.369	347.342	288.959	325.769	311.19
	EOMA	364.274	395.444	386.282	402.105	365.97	371.998	361.782	345.683	382.428	343.107	329.335	376.098	307.097	329.36	342.478	305.983	272.808	298.232
	HK-2	313.094	304.872	273.034	313.553	309.594	281.615	282.164	314.735	266.414	245.015	286.662	287.021	268.087	267.908	228.474	195.722	195.173	178.508
	TCMK-1	277.667	260.905	310.428	287.613	269.975	296.809	274.451	292.193	254.519	233.424	274.741	263.784	243.691	232.156	263.766	171.162	199.097	190.65
	BJ	427.595	423.996	390.41	395.23	426.601	406.529	382.185	437.698	391.61	391.854	409.655	354.021	357.971	390.429	344.846	304.614	347.819	323.872
	NIH/3T3	430.611	439.937	410.452	458.41	422.983	411.347	450.394	504.588	456.834	518.71	610.106	546.004	574.385	653.95	569.634	680.786	737.946	681.467
