# Supplementary material for: RETRACTED: Endocytic recycling and vesicular transport systems mediate transcytosis of Leptospira interrogans across cell monolayer
Source: eLife journal article supplement (doi:10.7554/elife.44594), 2019-04-23
Supplement: supp [file elife_poa_e44594_Figure_7_source_data_1.xls]

## Sheet:   Figure 7B 
	Figure 7B
	Cells	Before infection			Time of re-incubation (h)
					4			8			12			16			24
	HUVEC	92.7813	95.5928	96.987	97.878	96.0265	94.0981	91.4998	92.3373	98.6905	92.1806	98.1874	90.8631	93.4084	92.2101	96.4502	95.7425	93.5873	96.6936
	EOMA	92.914	95.5881	97.1867	94.4163	95.5301	98.1078	96.1221	90.9875	96.1383	91.5085	98.4143	92.4872	95.8383	97.657	91.5484	93.3201	98.7508	96.6808
	HK-2	97.8814	94.0971	94.1617	97.5513	94.9976	92.3173	90.0166	95.8242	93.8511	94.7706	93.6909	99.4392	94.0997	97.6791	92.3995	97.2796	90.577	97.0703
	TCMK-1	96.8924	97.6566	93.6589	96.9148	97.7725	93.1908	96.8291	91.5397	91.0423	95.5856	91.9307	97.0624	93.4453	91.1427	96.117	99.3855	94.9283	93.2018
	BJ	96.8656	95.4011	92.6977	91.1316	96.5925	96.5525	90.979	91.3322	97.7823	99.1159	92.5065	93.5572	94.4736	99.47	92.9217	94.8935	98.9276	91.1281
	NIH/3T3	92.6554	96.3657	96.3801	95.489	91.1945	96.371	89.7233	95.6695	96.394	95.6928	92.5825	99.0203	98.0171	90.94	94.4216	91.2436	97.8203	97.3093

## Sheet:   Figure 7C 
	Figure 7C
	Cells	Before infection			Time of re-incubation (h)
					4			8			12			16			24
	HUVEC	57800000	64200000	60800000	57800000	59600000	62200000	62400000	58000000	60200000	59800000	62800000	66200000	61000000	57800000	57400000	57000000	61200000	60400000
	EOMA	57600000	62400000	58200000	55800000	59400000	61400000	59000000	60800000	65200000	65800000	61400000	62000000	63200000	64000000	58000000	60000000	63400000	58200000
	HK-2	56000000	59800000	61600000	58200000	62800000	62000000	58400000	62000000	58600000	59600000	58000000	63400000	64600000	63400000	60400000	56000000	61800000	60600000
	TCMK-1	61800000	60800000	66800000	57000000	62800000	61200000	62600000	66000000	60000000	62200000	59200000	63400000	63600000	65800000	59600000	61600000	61600000	58400000
	BJ	65000000	59400000	60400000	61000000	67000000	61200000	59400000	64600000	61400000	62600000	58600000	64400000	63200000	59200000	58800000	57400000	54800000	60400000
	NIH/3T3	55200000	58600000	59800000	61200000	55400000	56800000	59600000	62800000	66400000	59400000	64000000	59600000	62200000	60000000	56600000	58200000	58800000	64400000

## Sheet:   Figure 7D 
	Figure 7D
	Cells	Before infection			Time of infection (h)
					1			2			4			8			12			24
	HUVEC	99.8348	96.4487	97.7227	95.6323	99.3126	95.834	99.9378	94.1202	96.6225	96.2894	95.8344	100.072	94.9438	96.7786	99.2367	97.8612	94.7153	99.3216	99.3474	93.3976	96.6602
	EOMA	99.2637	96.0945	98.7237	96.9827	99.3558	96.8538	100.04	97.0221	96.0164	95.2698	92.6713	98.8403	97.5022	97.0574	99.7919	96.5095	99.1221	99.1665	99.5433	94.8095	97.9408
	HK-2	97.7029	96.4603	99.9114	94.9617	98.1783	98.608	99.1239	95.4405	98.513	94.7878	99.9215	96.9092	99.6511	96.4796	95.7127	97.2807	99.753	97.0555	97.4284	99.8339	96.9435
	TCMK-1	97.2282	99.7383	97.0749	93.9823	96.1139	99.0493	99.837	96.3403	96.1038	93.4562	98.4506	97.7081	91.8126	96.7805	96.8882	91.838	95.1669	97.4689	93.592	97.8999	98.7219
	BJ	99.11	98.9078	95.974	98.6754	98.3046	94.9187	97.2915	98.867	93.7789	96.4933	97.497	92.8122	97.7187	99.7326	95.2885	97.2284	93.1142	93.2535	94.6712	99.832	97.3366
	NIH/3T3	98.7394	99.2087	96.0622	96.9487	93.0491	98.5553	92.3072	99.1461	95.3144	96.6147	100.103	95.3399	94.567	99.4575	97.5475	92.8941	95.4618	99.6464	95.5672	92.0332	98.6551
