# Supplementary material for: RETRACTED: Endocytic recycling and vesicular transport systems mediate transcytosis of Leptospira interrogans across cell monolayer
Source: eLife journal article supplement (doi:10.7554/elife.44594), 2019-04-23
Supplement: supp [file elife_poa_e44594_Figure_8_source_data_1.xls]

## Sheet:   Figure 8B  
	Figure 8B		upper to lower
	Cells		Without cells			HUVEC			EOMA			HK-2			TCMK-1			BJ			NIH/3T3
	Time of infection (h)	0	0	0	0	0	0	0	0	0	0	0	0	0	0	0	0	0	0	0	0	0	0
		1	26.8889	33.5117	29.8755	3.35019	9.56601	4.93691	8.75405	2.04949	3.24347	3.6229	5.66483	1.6429	6.19988	2.87902	5.33457	5.65328	4.01502	2.3682	3.20652	5.99203	5.41302
		2	49.9748	47.7149	43.897	13.3551	8.28658	15.8224	11.2278	6.44556	12.3409	10.9028	5.00469	5.16512	10.2907	4.1359	11.3417	13.096	10.3703	8.40287	5.70812	11.4942	8.85755
		4	49.6885	55.7824	51.5728	32.1461	34.8725	24.7549	27.3152	24.5228	29.3463	19.0625	22.1893	17.8341	24.8827	17.0547	22.6063	19.4844	25.6446	22.9413	26.911	25.6011	21.9453
		8	51.2699	50.3417	57.089	45.889	48.8928	41.1456	42.8739	50.523	48.6916	33.5704	33.857	26.623	28.8006	36.4722	37.2372	42.1374	44.182	34.2012	43.6131	43.4013	40.3198
		12	57.3398	46.9247	52.3631	51.0155	50.7893	56.8356	50.8327	57.2228	52.6896	37.8643	44.9526	47.8017	52.5001	43.7741	40.0622	48.2972	53.2902	44.0218	51.071	45.3973	54.1623
		24	53.244	50.9944	55.9303	48.6153	52.0034	54.4064	53.9642	55.6441	49.1267	42.7584	47.382	54.1026	51.3832	46.0128	43.3776	45.8457	44.4066	59.9726	47.3174	56.7204	46.5044
	Figure 8B		lower to upper
	Cells		Without cells			HUVEC			EOMA			HK-2			TCMK-1			BJ			NIH/3T3
	Time of infection (h)	0	0	0	0	0	0	0	0	0	0	0	0	0	0	0	0	0	0	0	0	0	0
		1	27.3116	26.8772	33.8485	6.00795	7.95828	1.67582	2.50936	8.05652	3.26635	3.42582	2.89179	3.34858	4.82344	1.92379	4.85709	4.53389	3.2443	6.50024	2.62136	5.83811	1.89286
		2	43.7691	42.8994	51.0144	11.5873	8.20756	19.2987	16.4722	6.66647	12.9854	4.32929	8.99208	8.55693	5.62223	0.933056	9.69681	10.2349	6.95253	11.8809	5.63166	10.5336	6.79361
		4	51.6152	45.8493	50.852	32.3393	23.3668	26.1791	31.7152	25.4684	30.1398	25.057	19.3901	14.9916	17.2384	22.316	16.1333	23.2338	28.0461	21.0505	15.414	25.4763	26.3599
		8	50.9189	51.775	43.0643	39.548	43.3896	48.3006	47.9745	43.0452	34.3786	30.2669	31.3473	26.0978	32.1485	29.0115	34.8229	41.5701	35.2219	33.7934	43.8005	35.4164	38.8618
		12	47.7924	53.5848	46.6377	44.2226	53.5391	43.2474	43.6436	45.7574	53.4467	44.3572	37.3045	38.5543	40.1978	44.9365	38.7777	50.9665	45.407	35.9005	40.5448	37.4794	51.9499
		24	50.1591	51.8849	44.0026	52.529	49.9735	43.2887	48.5407	43.1505	51.0201	46.9153	43.6013	38.8927	48.1547	45.589	39.2634	49.922	48.9524	41.3391	39.889	51.7066	45.2052

## Sheet:   Figure 8C  
	Figure 8C									Figure 8C
	upper to lower									lower to upper
	Cells		HUVEC	EOMA	HK-2	TCMK-1	BJ	NIH/3T3		Cells		HUVEC	EOMA	HK-2	TCMK-1	BJ	NIH/3T3
	Time of infection (h)	0	224	215	215	215	213	208		Time of infection (h)	0	216	221	213	212	209	216
			221	217	213	212	217	211				220	219	215	211	214	208
			218	223	210	209	211	213				224	214	212	215	210	210
		1	215	221	210	213	210	209			1	215	215	209	212	213	208
			218	225	211	211	212	210				220	217	216	211	209	207
			219	220	214	209	215	212				219	221	211	209	211	211
		2	215	217	215	209	212	214			2	219	219	211	211	210	212
			219	222	212	214	209	212				215	223	209	215	214	208
			215	218	210	212	211	209				220	218	210	211	211	209
		4	217	223	209	211	213	211			4	218	219	207	212	215	212
			216	216	214	214	210	209				222	213	212	213	211	209
			223	221	212	209	211	214				216	218	214	211	209	207
		8	220	225	208	215	215	208			8	220	215	210	210	211	212
			216	221	210	211	213	213				218	219	207	216	212	209
			213	220	213	209	209	209				222	220	214	212	209	209
		12	214	221	210	209	211	209			12	216	221	214	208	216	214
			220	216	215	209	215	213				220	219	212	213	211	208
			215	225	212	213	210	215				221	223	211	214	208	213
		24	219	219	209	215	213	208			24	219	215	211	214	216	212
			223	224	216	211	209	207				224	224	210	211	211	209
			217	220	211	209	211	212				219	218	215	214	211	208

## Sheet:   Figure 8D  
	Figure 8D
	Cells		Without cells			HUVEC			EOMA			HK-2			TCMK-1			BJ			NIH/3T3
	Time of infection (h)	0	0	0	0	0	0	0	0	0	0	0	0	0	0	0	0	0	0	0	0	0	0
		1	45.8548	45.8464	55.392	4.68624	1.01751	1.44196	1.89177	5.66994	1.97323	2.68768	2.2078	4.4059	0.880589	3.52546	2.65564	4.9885	0.500989	5.17781	2.61637	6.05642	2.39806
		2	48.6175	56.7691	54.4673	9.87012	7.64381	4.40165	11.6838	7.78672	3.27225	9.79113	6.89925	11.3689	8.73194	7.84038	3.45511	6.90981	6.60288	12.5227	6.61975	9.91934	9.48598
		4	49.2181	49.952	58.24	10.3101	14.4253	16.6221	17.2653	14.9704	10.6733	13.3822	14.1911	19.4164	19.6279	14.7474	14.7824	9.94196	12.4989	17.8666	15.7665	11.0234	18.1453
		8	47.9801	58.0938	55.9547	14.408	11.0488	16.4488	13.1896	16.1645	12.4794	20.2101	14.4482	15.3606	19.2006	12.4276	13.9608	9.45422	18.3075	16.335	13.2353	10.739	20.0802
		12	58.8656	51.2317	52.3266	13.2508	11.6677	16.3931	19.2297	14.8189	15.8857	16.2886	18.907	10.6847	15.5533	19.4615	8.87524	11.1822	10.2944	19.0473	20.2132	11.779	9.77712
		24	47.806	57.9166	53.7841	15.4318	17.6524	13.8975	18.266	12.9278	9.64041	20.4431	12.9434	17.0044	11.1781	20.5725	13.2923	17.1244	9.89287	17.9129	9.66281	16.3384	15.7861
